# Supplementary material for: Facile synthesis of a high-efficiency NiFe bimetallic catalyst without pre-reduction for the selective hydrogenation reaction of furfural
Source: Royal Society of Chemistry journal article supplement (doi:10.1039/d2cy01599d), 2022-11-14
Supplement: d2cy01599d1.pdf [file d2cy01599d1.pdf]

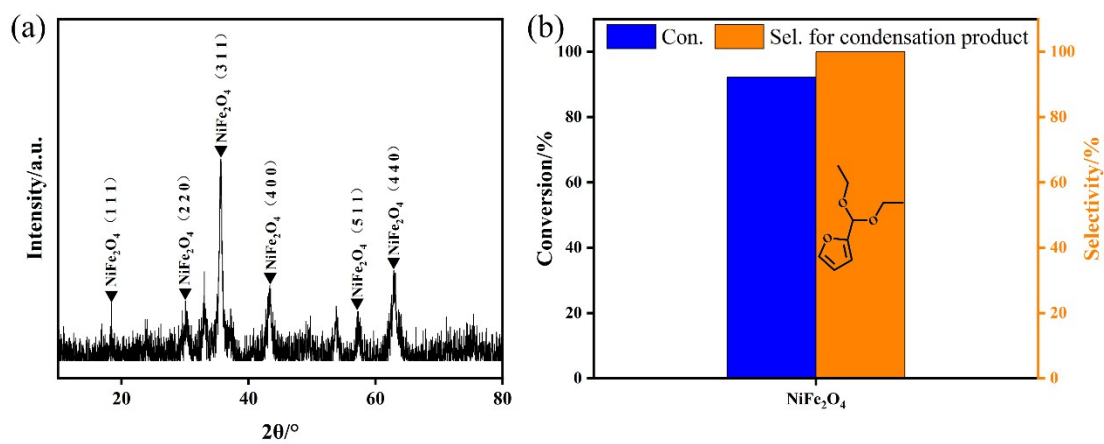

Fig. S1 XRD pattern of NiFe<sub>2</sub>O<sub>4</sub> catalyst(a) and furfural hydrogenation reaction result with NiFe<sub>2</sub>O<sub>4</sub> catalyst(b).

Table S1 Desorption peak temperature and hydrogen adsorption quantity of 2NaNi, 2NaFe, 0NaNiFe and 2NaNiFe

| Sample  | Temperature at maximum/°C | Quantity/mmol/g         |
|---------|---------------------------|-------------------------|
| 2NaNi   | 86.3                      | 0.20887                 |
|         | 289.4                     | $3.696 \times 10^{-2}$  |
|         | 382.8                     | $6.678 \times 10^{-2}$  |
| 2NaFe   | 114.7                     | 0.18650                 |
|         | 716.2                     | 2.16829                 |
| 0NaNiFe | 106.4                     | 0.12948                 |
|         | 318                       | $2.697 \times 10^{-2}$  |
|         | 384.6                     | $9.408 \times 10^{-3}$  |
|         | 464                       | $99.370 \times 10^{-2}$ |
| 2NaNiFe | 136.6                     | 0.30649                 |
|         | 246.7                     | 0.1383                  |
|         | 322.8                     | $3.880 \times 10^{-2}$  |
|         | 490.3                     | 0.11348                 |

Table S2 The ratio of Ni and Fe on liner scan, mapping scan and ICP-MS of 2NaNiFe

| Test Measure | Ni/%               | Fe/%               | Ni:Fe |
|--------------|--------------------|--------------------|-------|
| Liner scan   | 62.68 <sup>a</sup> | 15.36 <sup>a</sup> | 4.08  |
| Mapping      | 11.68 <sup>a</sup> | 2.74 <sup>a</sup>  | 4.26  |
| ICP-MS       | 12.50 <sup>b</sup> | 2.89 <sup>b</sup>  | 4.33  |

a: the value indicates the atomic percent of element in catalyst

b: the value indicates the element concentration of catalyst, mmol/g.

Table S3 The BE on Na 1s, O 1s, Ni 2p and Fe 2p of 2NaNiFe under Ex XPS and In XPS condition

| Entry  | Na 1s                | O 1s                |                                  | Ni 2p               |                                          | Fe 2p              |                                |
|--------|----------------------|---------------------|----------------------------------|---------------------|------------------------------------------|--------------------|--------------------------------|
|        | Na                   | Ni(OH) <sub>2</sub> | NiFe <sub>2</sub> O <sub>4</sub> | Ni <sup>0</sup>     | NiFe <sub>2</sub> O <sub>4</sub>         | Fe <sup>0</sup>    | Fe <sub>2</sub> O <sub>3</sub> |
| Ex XPS | 1071.42 <sup>1</sup> | 531.6               | 529.9                            | 852.54              | 855.4                                    | 706.7              | 711.4                          |
| In XPS | 1071.95              | 531.7 <sup>2</sup>  | 530 <sup>3</sup>                 | 852.78 <sup>4</sup> | 855.5(Ni(OH) <sub>2</sub> ) <sup>5</sup> | 706.5 <sup>6</sup> | 711.6 <sup>7</sup>             |

Table S4 Catalytic performance of recently developed catalysts for the hydrogenation reaction of furfural

| Entry | Catalyst                              | Reduction                        | Reaction condition           |                              |             |              |            |            |            | Ref.      |
|-------|---------------------------------------|----------------------------------|------------------------------|------------------------------|-------------|--------------|------------|------------|------------|-----------|
|       |                                       | before reaction                  | $m_{\text{furfural}}$<br>/mg | $m_{\text{catalyst}}$<br>/mg | Tem.<br>/°C | Pre.<br>/MPa | Time<br>/h | Con.<br>/% | Sel.<br>/% |           |
| 1     | Ir <sub>1</sub> /mpg-TiO <sub>2</sub> | 250°C, 2h                        | 96                           | 120                          | 140         | 1            | 6          | 99         | 99         | 8         |
| 2     | Pt/m-CN-2                             | No                               | 252                          | 29                           | 70          | 1            | 2          | 99.3       | 98.5       | 9         |
| 3     | Pd/MnO <sub>2</sub>                   | No                               | 1000                         | 10                           | 180         | 2            | 5          | 83         | 60         | 10        |
| 4     | Pt <sub>1</sub> Cu <sub>20</sub>      | 300°C, 0.5h                      | 20                           | 30                           | 50          | 2            | 7          | 97         | 99         | 11        |
| 5     | Ni@OMC                                | No                               | 290                          | 100                          | 180         | 3            | 12         | 92.3       | 98.6       | 12        |
| 6     | CuNi/ <i>rss</i> AC                   | NaBH <sub>4</sub> ,<br>70°C, 12h | 250                          | 25                           | 140         | 1.5          | 4          | 100        | 84.4       | 13        |
| 7     | Ni-Fe(2)CeO <sub>2</sub><br>HT-573    | No                               | 106                          | 50                           | 150         | 1            | 0.5        | 96         | 95         | 14        |
| 8     | NiCoZn@CN-600                         | 400°C, 2h                        | 245                          | 25                           | 160         | 2            | 3          | 100        | 85.6       | 15        |
| 9     | CuCo/Zn@NPC-<br>600                   | 400°C                            | 245                          | 25                           | 140         | 2            | 4          | 100        | 100        | 16        |
| 10    | 2NaNiFe                               | No                               | 700                          | 25                           | 130         | 1            | 1          | 98.21      | 98.39      | This work |

## Turnover frequency (TOF) calculations<sup>17</sup>

Turnover frequency (TOF) can unveil the consumption rate of per number of exposed  $\text{Ni}_3\text{Fe}_1$  sites on the catalyst. TOF should be evaluated under a stable furfural consumption state at low conversion. The  $\text{Ni}_3\text{Fe}_1$  alloy distribution and structure of 2NaNiFe catalyst had been confirmed by XRD and HRTEM.

We supposed that the (111) plane of  $\text{Ni}_3\text{Fe}_1$  phase was bounded on the spherical nanoparticles and defined the lattice distance and the particle diameter as  $d$  and  $d'$ , respectively. It can be known that only face-centered cubic  $\text{Ni}_3\text{Fe}_1$  alloy phase existed in 2NaNiFe catalyst, so the space utilization of closet packing is 74.05%.

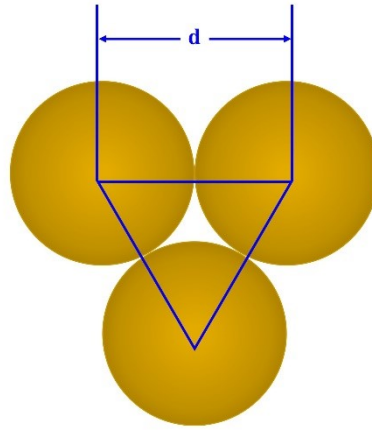

$$\text{a. Area of single } \text{Ni}_3\text{Fe}_1 \text{ unit} = 2 \times \frac{1}{2}d \times \frac{\sqrt{3}}{2}d = 0.866d^2$$

$$\text{Superficial area of one spherical nanoparticle} = \pi d'^2$$

$$N_{\text{sa}} \text{ (Number of surface atoms)} = \pi d'^2 / 0.866d^2 = 3.626\pi d'^2 / d^2$$

$$\text{b. Volume of single atom} = \frac{\pi d^3}{6}$$

$$\text{Volume of one spherical nanoparticle} = \frac{\pi d'^3}{6}$$

$$N_{\text{san}} \text{ (Number of surface atoms of one spherical nanoparticle)} = \frac{\pi d'^3}{6} \times 74.05\% / \frac{\pi d^3}{6} = 0.7405 \times d'^3 / d^3$$

$$D \text{ (Dispersion)} = N_{\text{sa}} / N_{\text{san}} = (3.626\pi d'^2 / d^2) / (0.7405 \times d'^3 / d^3) = 4.90 \times d / d'$$

The TOF value of 2NaNiFe catalyst was calculated as follow:  $n_{\text{furfural}} = 700/96.08 =$

7.2856 mmol, Conversion<sub>15min</sub> = 49.57%, n<sub>metal</sub> = (12.5028+2.8863) × 0.025=0.3847

mmol, D<sub>metal</sub> = 4.9×0.205/11.2 = 0.0897, t = 0.25 h.

TOF<sub>2NaNiFe</sub> (h<sup>-1</sup>) = 7.2856×49.57%/(0.3847×0.0897×0.25) = 418.63 h<sup>-1</sup>

## References

1. S. P. Kowalczyk, L. Ley, F. R. McFeely, R. A. Pollak and D. A. Shirley, *Physical Review B*, 1973, **8**, 3583-3585.
2. K. S. Kim and N. Winograd, *Surface Science*, 1974, **43**, 625-643.
3. G. C. Allen and K. R. Hallam, *Appl. Surf. Sci.*, 1996, **93**, 25-30.
4. C. E. Dubé, B. Workie, S. P. Kounaves, A. Robbat, M. L. Aksub and G. Davies, *J. Electrochem. Soc.*, 1995, **142**, 3357-3365.
5. T. Dickinson, A. F. Povey and P. M. A. Sherwood, *Journal of the Chemical Society, Faraday Transactions 1: Physical Chemistry in Condensed Phases*, 1977, **73**, 327-343.
6. *Surf. Interface Anal.*, 1987.
7. P. Mills and J. L. Sullivan, *Journal of Physics D: Applied Physics*, 1983, **16**, 723-732.
8. S. B. Tian, W. B. Gong, W. X. Chen, N. Lin, Y. Q. Zhu, Q. C. Feng, Q. Xu, Q. Fu, C. Chen, J. Luo, W. S. Yan, H. J. Zhao, D. S. Wang and Y. D. Li, *ACS Catal.*, 2019, **9**, 5223-5230.
9. J. Li, M. Zahid, W. Sun, X. Tian and Y. Zhu, *Appl. Surf. Sci.*, 2020, **528**.
10. H. Lee, C. Nguyen-Huy, E. J. Jang, J. Lee, E. Yang, M. S. Lee, J. H. Kwak and K. An, *Catal. Today*, 2021, **365**, 291-300.
11. M. J. Taylor, S. K. Beaumont, M. J. Islam, S. Tsatsos, C. A. M. Parlett, M. A. Issacs and G. Kyriakou, *Appl. Catal. B: Environ.*, 2021, **284**, 10.
12. X. Wang, M. Qiu, R. L. Smith, Jr., J. Yang, F. Shen and X. Qi, *ACS Sustain. Chem. Eng.*, 2020, **8**, 18157-18166.
13. Q. Fu, S. Yang, P. Ning, R. Miao, L. He and Q. Guan, *ChemCatChem*, 2021, **13**, 4164-4181.
14. W. S. Putro, T. Kojima, T. Hara, N. Ichikuni and S. Shimazu, *Catal. Sci. Technol.*, 2017, **7**, 3637-3646.
15. S. Li, Y. Fan, C. Wu, C. Zhuang, Y. Wang, X. Li, J. Zhao and Z. Zheng, *ACS Appl. Mater. Interfaces*, 2021, DOI: 10.1021/acsami.1c01436.
16. Y. Fan, S. Li, Y. Wang, C. Zhuang, X. Liu, G. Zhu and X. Zou, *Nanoscale*, 2020, **12**, 18296-18304.
17. Z. L. Wu, J. Wang, S. Wang, Y. X. Zhang, G. Y. Bai, L. Ricardez-Sandoval, G. C. Wang and B. Zhao, *Green Chem.*, 2020, **22**, 1432-1442.
